# Supplementary material for: Synthesis of Helical Phenolic Resin Bundles through a Sol-Gel Transcription Method
Source: MDPI journal article supplement (doi:10.3390/gels3010009), 2017-02-23
Supplement: s1 [file s1]

# Synthesis of Helical Phenolic Resin Bundles through a Sol-Gel Transcription Method

Changzhen Shao, Jiangang Li, Hao Chen, Baozong Li, Yi Li and Yonggang Yang

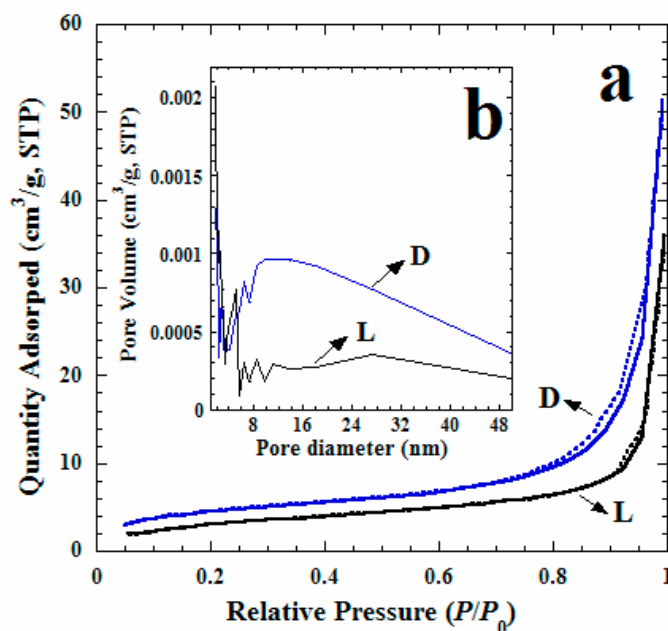

**Figure S1.** (a) Nitrogen sorption isotherms and (b) BJH pore size distributions calculated from the desorption branch of L- and D-HPR.

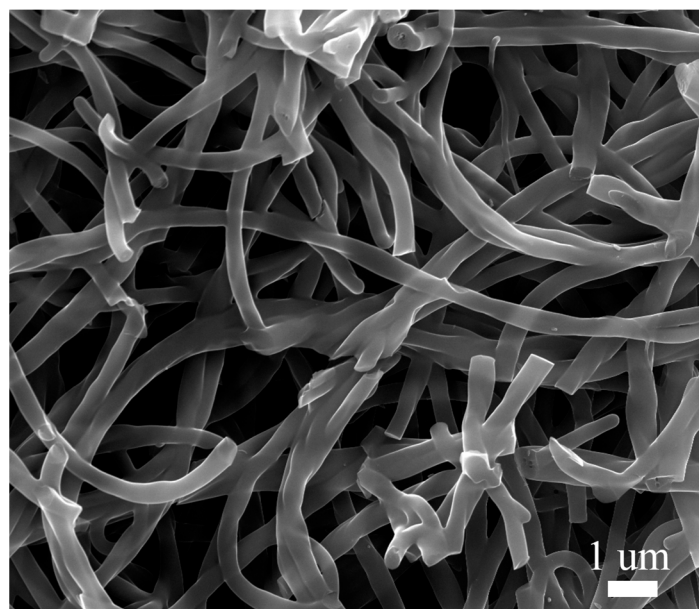

**Figure S2.** FE-SEM image of D-HPR after carbonization.
